# Supplementary material
Source: publisher site journal article supplement (https://www.spandidos-publications.com/2140/downloadSupplementary)

Figure S1. CTSB expression levels following transfection with siCTSB or Ad-CTSB. The protein expression of CTSB in H9C2 transfected with siCTSB. (A) Western blotting images and (B) quantitative results. \* $P < 0.05$  vs. siNC. Protein expression levels of CTSB in H9C2 transfected with Ad-CTSB. (C) Western blotting images and (D) quantitative results.  $n = 6$ . \* $P < 0.05$  vs. Ad-NC. CTSB, cathepsin B; si, small interfering; Ad, adenovirus; NC, negative control.

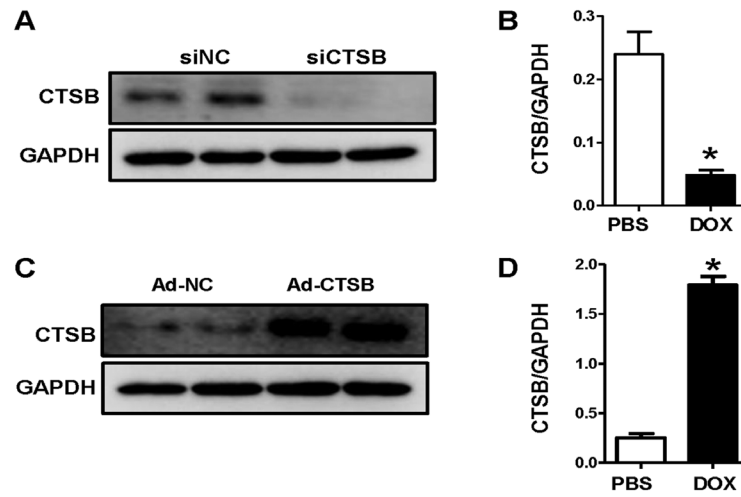

Supplement: Supplementary file 1 [file downloadSupplementary]
